# Supplementary material
Source: PubMed Central journal article supplement (PMC3293567)
Supplement: supp_M111.306936_jbc.M111.306936-1.pdf [file supp_M111.306936_jbc.M111.306936-1.pdf]

## SUPPLEMENTARY INFORMATION

TABLE S1. Sequences of primers used.

Figure S1. RUNX binding sites are conserved at *NCR1* promoter. *NCR1* proximal upstream regions in 10 mammals were aligned using EBI Clustal2W. Bases identical in at least 8 species are highlighted in yellow. TESS sites that are found in multiple species are boxed. Note only RUNX and ETS sites are highly conserved. The distal RUNX site in mouse and rat are found in the antisense direction and offset by a few base pairs, suggesting convergent evolution. The tissue specific and essential regulatory sequences are marked by solid and dashed lines under the sequence, respectively.

Figure S2. Promoter constructs transfected into KY-2 mouse NK cell line.  $2.5 \times 10^5$  KY-2 cells were transfected using Lipofectamine 2000 (Invitrogen) according to manufacturer instructions. Transfection mix consisted of 1  $\mu$ g vector, 0.1  $\mu$ g pRL-TK, and 2  $\mu$ g Lipofectamine 2000. Cells were incubated for 24 hours before assaying using the Dual-Luciferase Reporter Assay System (Promega) according to the manufacturer's instructions. Firefly luciferase activity was normalized relative to Renilla luciferase activity for each transfection and calculated as fold increase over pGL4.10-BASIC (pGL4B).

Figure S3. *Ncr1*, *Runx1*, *Runx3* transcripts in mouse. (A) RT-PCR detection in mouse cell lines with *Actb* as internal control. Total RNA from indicated cell lines was used for reverse transcriptase reactions. (B) Microarray of *Runx1* and *Runx3* expression. Data accessed through BioGPS (51). Mouse data from GeneAtlas MOE430 probe set 1427650\_a\_at for *Runx1* and 1440275\_at for *Runx3* (53). Only relevant hematopoietic cell types are shown.

**Table S1**

| Primer set name     | Forward Primer                           | Reverse Primer                            |
|---------------------|------------------------------------------|-------------------------------------------|
| hNCR1-RT-PCR        | 5'caccctctcggttcatcc                     | 5'gagattctgggcagtgtg                      |
| hACTB-RT-PCR        | 5'aaggagatcactgccctggc                   | 5'ccacatctgctggaaggtgg                    |
| 5'95-pGL4B          | 5'aaggtaccgctggtgctcaccacc               | 5'aagctagctgctcagattctgccgg               |
| 5'200-pGL4B         | 5'aaggtaccgtgtcagagggaccacgg             | Same as above                             |
| 5'270-pGL4B         | 5'aaggtaccgagaagtgaccagaaatgc            | Same as above                             |
| 5'395-pGL4B         | 5'aaggtaccctgttccagtatctcactg            | Same as above                             |
| 3'276-pGL4B         | Same as above                            | 5'aagctagcactgctttcatcagaacg              |
| 3'196-pGL4B         | Same as above                            | 5'aagctagcatctgtggtctagccagc              |
| 3'105-pGL4B         | Same as above                            | 5'aagctagctaccagagctgactgtg               |
| hPU.1-RT-PCR        | 5'ccaacgcacagattatcc                     | 5'aagctctgaactcgtctgtg                    |
| hCJUN-RT-PCR        | 5'aaggaagctggagagaatcg                   | 5'tgtttaagctgtgccacctg                    |
| hJUNB-RT-PCR        | 5'cgatctgcacaagatgaacc                   | 5'tgctgaggttggtgtaaacc                    |
| hJUND-RT-PCR        | 5'gcctcatcatccagtccaac                   | 5'tctgcttggtgtaaatcctccag                 |
| hCEBPa-RT-PCR       | 5'tggacaagaacagcaacagag                  | 5'ttctcactggtcagctccag                    |
| hMYB-RT-PCR         | 5'cagcccactgttaacaacgac                  | 5'ctggctgaggacattgac                      |
| hMEIS1-RT-PCR       | 5'ggaggatcaaaatcagacagtg                 | 5'tcctctgaacgagtagatgc                    |
| hCP2-RT-PCR         | 5'ggtgaagagtatttccgtgtgg                 | 5'attctgtctccaggtcggttc                   |
| hE2A-RT-PCR         | 5'gaagcagcagcagctttg                     | 5'gagaaggaggatgcagatgg                    |
| hRUNX1-qPCR         | 5'tcaggtttgtcggtcgaag                    | 5'gccatccactgtgattttg                     |
| hRUNX3-qPCR         | 5'gttcaacgaccttgccttc                    | 5'gtccacggcactctgatg                      |
| hRUNX3dist-RT-PCR   | 5'acactctgccgaccttcat                    | Same as above                             |
| hRUNX3prox-RT-PCR   | 5'tattcccgtagaccaagca                    | Same as above                             |
| mNcr1-RT-PCR        | 5'tggctcttacaacgactatgc                  | 5'agaagaagtaggctcggtaggtg                 |
| mRunx1-RT-PCR       | 5'tagcgagattcaacgacctc                   | 5'atgtaggtggcaactttgtg                    |
| mRunx3-RT-PCR       | 5'ggttcaacgaccttgcattc                   | 5'cggtgtaggttagccacttg                    |
| mActb-RT-PCR        | 5'aaggccaacctgaaaagat                    | 5'gtggtacgaccagaggcatac                   |
| distRUNXmut         | 5'gagttgctggctagacgttagatgtgtcagaggg     | 5'ccctctgacacatctaactctagccagcaactc       |
| proxRUNXmut         | 5'gctggtgctcaccacggttctctgtatctatc       | 5'gatagatacacaggaaaactggtgtagcaccagc      |
| hNCR1promoter-ChIP  | 5'ctgatgaagcagctcaacgtg                  | 5'gggccaggagatagatacac                    |
| h+8intergenic-ChIP  | 5'tatcttgacaaggctcagc                    | 5'gcttcagcactgaatgatcc                    |
| hCD122promoter-ChIP | 5'caagcaggtccctctaggtg                   | 5'taacggagtaaggggcttc                     |
| mNCR1promoter-ChIP  | 5'aaatgggtgcagactgagc                    | 5'accattgacctaggactcagg                   |
| mIfng-qPCR          | 5'cacggcacagctcattgaag                   | 5'ccagttcctccagatatccaag                  |
| mPrf1-qPCR          | 5'gtgtcgcattgtacagttttcg                 | 5'tgtgtaagcatgctctgtg                     |
| m18S-qPCR           | 5'gtaaccggtgacccccatt                    | 5'ccatccaatcggtagtagcg                    |
| mB2m-qPCR           | 5'catggtcgtcgtggtgacc                    | 5'aatgtgagcgggtggaactg                    |
| mCD43-qPCR          | 5'agtttcttgaccaccttgg                    | 5'ttctggaagcagtgctgatg                    |
| EMSA(enhancer)-WT   | 5'ggtgctgctag <b>accaca</b> gatgtgtcagag | 5'ctctgacacatct <b>gtggt</b> ctagccagcaac |
| EMSA(enhancer)-MU   | 5'ggtgctgctag <b>actgta</b> gatgtgtcagag | 5'ctctgacacat <b>taactg</b> ctagccagcaac  |
| EMSA(essential)-WT  | 5'tggtgctcacc <b>accact</b> ctctgtgtatct | 5'agatacacagga <b>agtggt</b> gggtgagcacca |
| EMSA(essential)-MU  | 5'tggtgctcacc <b>actgtt</b> ctctgtgtatct | 5'agatacacagga <b>aaactg</b> gggtgagcacca |

\*For EMSA oligos, putative RUNX binding sites and mutated sites are shown in bold.

|           |                                                              |                                                                  |
|-----------|--------------------------------------------------------------|------------------------------------------------------------------|
| Human     | -----CACATTCGTAAAT--TTCTTTT                                  | AATTCCTGTTCCAGTATCTCACTGTGAAACTCCC-----TATGTTTTTATACGATTCTC      |
| Rhesus    | -----CAC-TCCTTTAAT--TTCTTTT                                  | CATTCCTGTTCCAGTATCTCACTGTGAAATTCCC-----TGTGTTTTTATACGATTCTC      |
| Armadillo | -----                                                        | -----                                                            |
| Cow       | -----                                                        | -----CA-----CATATTTTTAAAATGACTTT                                 |
| Horse     | GAATAGAAATTTTATTAAAACATTGTAACAAATCTTTAAAGAAGATAGTGTT--ATCATT | CATTCCTGATGAGGTCAATTAATTT-----ATCCA-----AGCATATACATGCTGTACAC     |
| Panda     | -----                                                        | CATCCTGGTGAAACCAATTCCTG-----ACCCA-----AGCATATGCATACCAAGAG        |
| Elephant  | -----                                                        | -----                                                            |
| Dog       | -----CACAAAGTTTTTAAATGATCTAAC                                | ATTTCTGCTTGGTACACTACCCTATGCCTTTCCCTGGGCATAAATGTTCCACATTTTCATAATT |
| Mouse     | -----                                                        | -----TATTGGG-----GAGTCCCTCAGACCT-                                |
| Rat       | -----                                                        | -----TATTGGG-----AAATCCTCAGACCT-                                 |

|           |                                                               |                                                            |       |
|-----------|---------------------------------------------------------------|------------------------------------------------------------|-------|
|           |                                                               |                                                            | C/EBP |
| Human     | AGGGGG-----TTTCCTCTGGGCATGATTGGGCACA-----A                    | CTTCCCACAGTCAGCTCTGGGTA--CGACCTCCACATTGCAGAAT-----TGAGAAGT |       |
| Rhesus    | AGGGGG-----TTTCCTCTGAGCGTCATTAGGCCTG-----A                    | CTTCTCAGGTCAGCTCTGGGTA--CCACCTCCACATTGCAGAAT-----TGAGAAGC  |       |
| Armadillo | -----                                                         | -----AT-----TRAGAGAT                                       |       |
| Cow       | AAGGGT-----TTTGCTCTGTAC-----A                                 | CTGCCCTATGCCTTCCCTGGGCA--TAAAGTCCCAATTCAAAAT-----TTACCAGT  |       |
| Horse     | AGGGGAAGCAGGGTTAAACAC-----TTTTTTAAATGATTCTAAGGTTTTTTCTCTGTACA | CTGCCCATGCCTTTTCTGGACA--TAATGTCCACATTTCAAAAT-----TTGGANGT  |       |
| Panda     | AGGGGAGCCAAGATTAACACATAATTTTTTTAAATGATTCT-                    | -----TTCTTGGCA--TAATGTCCACATTTCAAAAT-----TTGGANGA          |       |
| Elephant  | -----                                                         | -----CCCTGGGCA--TAATGTCCACATTTCAAAAT-----GTAGAAGT          |       |
| Dog       | TAGAAG-----TGAACCCCTGATTAGTAAATGAAAC-----A                    | CCAATAAAAAATAAATTTAAAAAATAAAAAAATAAATAAATAAATAAATACC       |       |
| Mouse     | -----TTTGCTCTGTGAAT-----                                      | -----CTCCCCATGCC-----TTCCTTGAATGAAT-----TTAAATGT           |       |
| Rat       | -----TTTGCTCTGTGAAT-----                                      | -----CTCCTCCATGCC-----TTCCTTGAATGGAT-----TTGTAGGT          |       |

|           |                                                               |                                                            |                                                            |  |
|-----------|---------------------------------------------------------------|------------------------------------------------------------|------------------------------------------------------------|--|
|           | C/EBP                                                         |                                                            | RUNX                                                       |  |
| Human     | TGACCCAGAAATGCATTTTGGGCTGAG--CAGACAATTGTCAGAGTTGCTGGCTAGA--C  | CACAGATGTG-TCAGA-----GGGACCACGGCCTTT---CTGTAA-GCTCAT--G    | CACAGATGTG-TCAGA-----GGGACCACGGCCTTT---CTGTAA-GCTCAT--G    |  |
| Rhesus    | TGACCCAGAAATGCATTTTGGGCTGAG--CAGACAAGTGTTCAGAGGAGCTGGCTAGA--C | CGCAGATGTG-TCAGA-----GGGACCATGGCCTTT---CCATAG-GCTCAT--G    | CGCAGATGTG-TCAGA-----GGGACCATGGCCTTT---CCATAG-GCTCAT--G    |  |
| Armadillo | TGACTCAGAAA--GAGTGGCGGGCGGA--TAGACGATTTTCAGAGGCTCTCGCTGGA--C  | CACAGGGGCGGTCAGAT--TCATGGGCAGCATGTCTTC---CTTCAG-ACCTCATAG  | CACAGGGGCGGTCAGAT--TCATGGGCAGCATGTCTTC---CTTCAG-ACCTCATAG  |  |
| Cow       | TGACCTAGAAAATGAGTTTCTGCCAGAAC--CAGACCATGTCAGAGGCTCTAGTTAGAAAC | CACAGATACACTCAGATGCATCATGGAACTACTCTTTT---CCTTACTGCAT--G    | CACAGATACACTCAGATGCATCATGGAACTACTCTTTT---CCTTACTGCAT--G    |  |
| Horse     | TGACTCATAAATGAGTTTCTAGTGTGAGG--CAGGCAATGTCAGAGGATCTGGTTAGA--C | CGCAGATATGACCAGATGTGTCGTGAGTACCATG---T---TCTTACGCCCAT--G   | CGCAGATATGACCAGATGTGTCGTGAGTACCATG---T---TCTTACGCCCAT--G   |  |
| Panda     | GGACCTGAAATGAGTTTCTAGGTTGGG--CAGACAATTGTCAGAGGATCTGGTTAGA--C  | CACAGACAGATCAGATGTGTCATGGGACCATGACCTGT---CPTTATGCCCTAT--G  | CACAGACAGATCAGATGTGTCATGGGACCATGACCTGT---CPTTATGCCCTAT--G  |  |
| Elephant  | GGAAACCAGAAATGGTTTTTCAGGCCAGA--CAAACAACCATTAG-----TTAGA--C    | CACACATGTGGTCAGAAGTTCATAGATGCCATGCTCTTTTATCCCTCAGACCCTG--G | CACACATGTGGTCAGAAGTTCATAGATGCCATGCTCTTTTATCCCTCAGACCCTG--G |  |
| Dog       | GAACCTGAGATGAGTCTCAGGTGAGG--CAGACAATTGTCAGAGGATCTGGTTAGA--C   | CACAGATGATCAGATATGTCATAGGGACCATGATTTGT---CTCAT--G          | CACAGATGATCAGATATGTCATAGGGACCATGATTTGT---CTCAT--G          |  |
| Mouse     | TAACCCAGAAATGGTTGCACTGAG--CAGTTGATGTCAGAAATAATCTTTAGAT-C      | CA-AAATGTGGTTAAATGTGTATGTGAACCAAGTTTGTG---CCTGAAGTCTAA--G  | CA-AAATGTGGTTAAATGTGTATGTGAACCAAGTTTGTG---CCTGAAGTCTAA--G  |  |
| Rat       | TAACCCAGAAATCGATTGCACTGAG--CAGTTGATGTCAGAGTAACTTCTAGAT-C      | CA-AAATGTGGTTAAATGTGTATGTGAACCAAGCCTTTG---TCTAAAGTCCAA--G  | CA-AAATGTGGTTAAATGTGTATGTGAACCAAGCCTTTG---TCTAAAGTCCAA--G  |  |

|           |                                                                |                                                             |                                                             |
|-----------|----------------------------------------------------------------|-------------------------------------------------------------|-------------------------------------------------------------|
|           |                                                                | RUNX                                                        | ETS                                                         |
| Human     | GTCAGAGGCGGAGGGG-AGTTGTGAA--CGTTCGTAT---GAAAGCAGTCAACGTGAAAG   | CGCTCTGGTGATGGG---CGTGGTGCTCACCCACCACCTCCTGTGATCTATCTCCCTG  | CGCTCTGGTGATGGG---CGTGGTGCTCACCCACCACCTCCTGTGATCTATCTCCCTG  |
| Rhesus    | GTCAGAGGTTGGAGGGGAGTGGTGAA--CGTTCATAAT---GAAAAGTCAACATGAAAG    | CTTCTCGCGCATGGG---CGCTGGGCTCAGCCACCACCTCCTGTGCATCT---CCCTG  | CTTCTCGCGCATGGG---CGCTGGGCTCAGCCACCACCTCCTGTGCATCT---CCCTG  |
| Armadillo | GTCAG--GGTGAGGAGACAGTCTGAATCTTCTCTGT---GAGAA--AGTCAATATGAAAG   | TCCCCTGGCAATGG---CTCTGGACCTTACCCACTACATCCTGTGTGCT---TTTTCA  | TCCCCTGGCAATGG---CTCTGGACCTTACCCACTACATCCTGTGTGCT---TTTTCA  |
| Cow       | GCCAGAGGTAGAAAGAACCTTTGAATCAT--CAGT---AAACA--AGTTGGTGTGAAAG    | CCTCTGGGCGACTCG---TCCCAGGCTTCACTACCCACATCCTGTGCATCT---CCCTG | CCTCTGGGCGACTCG---TCCCAGGCTTCACTACCCACATCCTGTGCATCT---CCCTG |
| Horse     | GTCAGAGGTGGAGGGAGAGCTGTGAA--CATTCCTGT---AAAA--GATCGATGTGAAAG   | CCCCATGGTGATGG---TGCTGGGCTCACCCACCACCTCCTGTGCATCT---TCCTG   | CCCCATGGTGATGG---TGCTGGGCTCACCCACCACCTCCTGTGCATCT---TCCTG   |
| Panda     | GTCAGAGGTAGAGGAAGACT--GAA--CCTTCTCAT---AAAA--G-TCAGTGTGAAAG    | CCCCATGGTGATGG---TGCTGGGCTCACCTACCACCTCCTGTGTGCT---CCTG     | CCCCATGGTGATGG---TGCTGGGCTCACCTACCACCTCCTGTGTGCT---CCTG     |
| Elephant  | GTCAGAGGTGGAGGGAAAGCTGTGAA--CCTTTCTAT---AAGAA--AGTCAAGTGTGAAAG | TCCCATGGTGATGG---TGCTGGGCTCACCTACCACCTCCTGTGCATCT---CCTG    | TCCCATGGTGATGG---TGCTGGGCTCACCTACCACCTCCTGTGCATCT---CCTG    |
| Dog       | GTCA--AAGTACAGGGAAGACTGTGAG--CCTTCTTAT---AAAA--GTCAGTGTGAAAG   | CCCCATGGTGATGG---TGCTGGGCTCACCCACCACCTCCTGTGCATCT---CCCTG   | CCCCATGGTGATGG---TGCTGGGCTCACCCACCACCTCCTGTGCATCT---CCCTG   |
| Mouse     | GTCAATGGTAAAGGGAGAGCTGTGAACTTTCTATTAATAAATAAATAAAT--GTGTGAAAG  | TCCCATGGTGACTAG---TGTCAGGCTCACCCACCACCTCCTGTGCATCT---CCCTG  | TCCCATGGTGACTAG---TGTCAGGCTCACCCACCACCTCCTGTGCATCT---CCCTG  |
| Rat       | ATCAATGGTAAAGGAGAGCTGTGAACTTTCTGTTTTAAAAAATAAATAAAT--GTGTGAAAG | TCCATGCTGATTAG---CGTTAGGCTCACCCACCACCTCCTGTGCATCT---CCCTG   | TCCATGCTGATTAG---CGTTAGGCTCACCCACCACCTCCTGTGCATCT---CCCTG   |

|           |                                                                |         |
|-----------|----------------------------------------------------------------|---------|
| Human     | GCCCCCGGGCTC---AGTCCCCAC-----TGCTCAGCACTAGGCC--GGCAGAACTCTGA-- | -GCGATG |
| Rhesus    | GCCCCGTGGGCTC---AGTCCCCACCCGCTGCTCAGCACTCGACC--GGTAGAATCTGA--  | -GCGATG |
| Armadillo | TCCTGCTCAGACACCGTGGTCTCCTCCAT-CTGCACAGT--TGGACCAGTGGAAAGGAGAT  | -GCCATG |
| Cow       | GCCCCGGGGCTCC---ATCTCCACCACAGCTGTCCA-CATTT-ACCAGGCAGAACTCTGA-- | -GCGATG |
| Horse     | GCCTACTGGCCTCA--GCTCTGCTCAGCTGCTCCACACTAGCCT--GGCAGAACTCTGT-   | -GCTATG |
| Panda     | GCCTCCTGGACTCC---GTCTCCACCAGCTGCTCCACATTCGTGC--GGTAGCATCAGT-   | -GCAATG |
| Elephant  | GCCTGCTGGACTTT--GCTCTCAACCAGCTGCTCCACATTCGCCT--GGCAGAACTCTGTG  | TGCTATG |
| Dog       | GCCTGCTGGGCTCA--GTCTCCACTCAGCTCCTCCATATGTGCTT--GGTATAATCAGT-   | -GCTATG |
| Mouse     | ACCCACTGGACTCA--ATCCACACACA-TAGTTCAGCACTGGTCTGGCCA--CTGG--     | -TATG   |
| Rat       | ACCCACAGGATCA--GTCCACATACA-CTATTCAAGCAGCCGGACTGGCTA--CTGG--    | -TATG   |

FIGURE S1

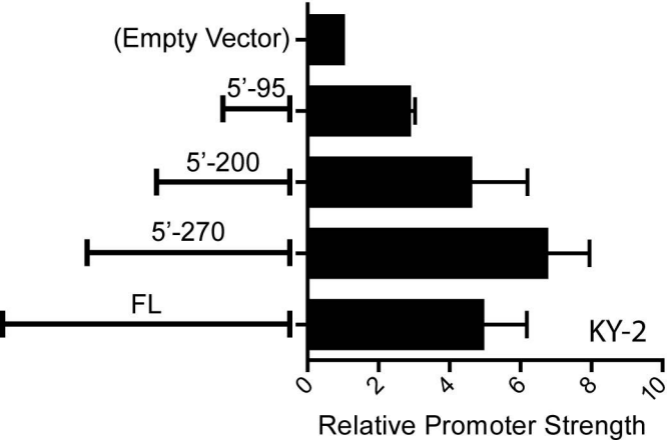

**FIGURE S2**

**A**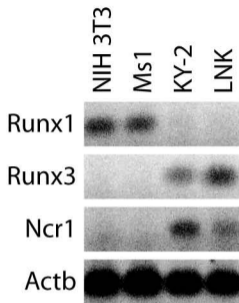**B**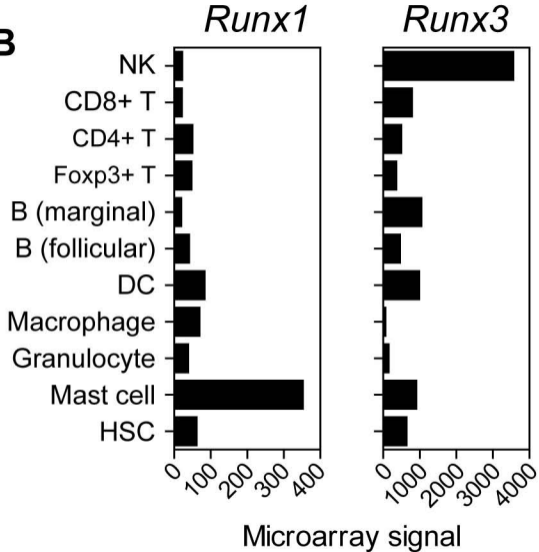**FIGURE S3**
